# Supplementary material
Source: PubMed Central journal article supplement (PMC2268133)

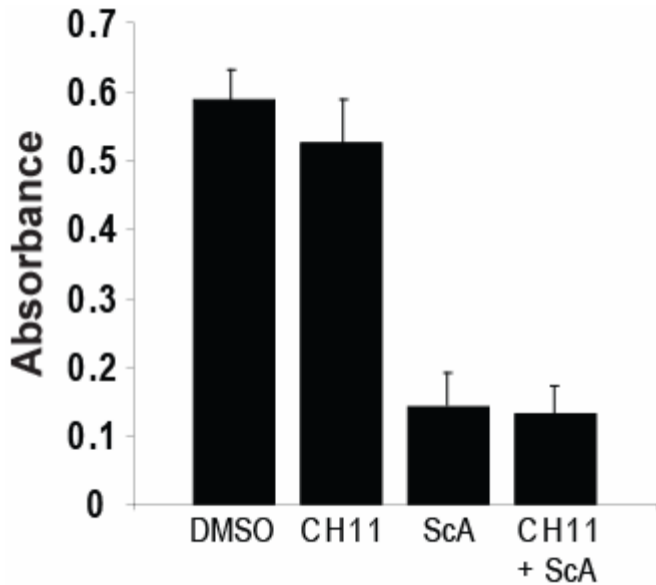

Supplement: supp_0712198105_12198Fig5.pdf [file supp_0712198105_12198Fig5.pdf]
